# Supplementary material for: Hormonome Dynamics During Microgametogenesis in Different Nicotiana Species
Source: Front Plant Sci. 2021 Oct 15;12:735451. doi: 10.3389/fpls.2021.735451 (PMC8553967; doi:10.3389/fpls.2021.735451)
Supplement: Supplementary Table 2 — Concentrations (pmol/g DW) of endogenous phytohormones during five developmental stages of Nicotiana alata pollen. [file Table_2.XLSX]

## Sheet: List1
tZ-type CKs	Nicotiana alata	tZ			tZR			tZ7G			tZ9G			Ʃ tZ-types
	stage 1	107.378	±	12.7329	45.1932	±	17.4469	23.5325	±	6.65734	3.81578	±	4.1483	179.919
	stage 2	72.1039	±	21.6457	10.5716	±	3.81638	49.5261	±	1.4937	5.27686	±	3.28143	137.479
	stage 3	72.4644	±	10.6703	9.32158	±	2.46001	20.8991	±	0.518222	6.09435	±	0.676916	108.78
	stage 4	95.569	±	6.60844	11.4286	±	2.79684	30.4767	±	0.695869	0	±	0	137.474
	stage 5	12.0379	±	0.851654	1.44907	±	0.0636342	10.9416	±	1.70639	1.02288	±	0.133802	25.4515
cZ-type CKs	Nicotiana alata	cZR			cZ7G			cZOG			cZ9G			cZRMP			Ʃ cZ-types
	stage 1	4.37904	±	3.65746	8.00369	±	6.1288	2.53318	±	0.509676	2.53302	±	0.509897	0	±	0	17.4489
	stage 2	57.159	±	7.97188	52.0974	±	8.64854	3.50618	±	0.253966	11.3497	±	0.415753	6.49449	±	0.816002	130.607
	stage 3	11.7473	±	0.679263	36.5319	±	2.01852	1.62787	±	0.0672835	1.56393	±	0.0231344	9.08883	±	2.07771	60.5598
	stage 4	542.916	±	124.545	18.6358	±	6.63426	2.75523	±	0.225889	2.99035	±	0.106629	892.205	±	100.445	1459.5
	stage 5	51.4894	±	9.38411	2.89661	±	0.857815	0	±	0	1.53573	±	0.951731	17.8916	±	5.30463	73.8133
iP-type CKs	Nicotiana alata	iP			iPR			iP7G			iP9G			iPRMP			Ʃ iP-types
	stage 1	67.8879	±	65.617	8.67007	±	0.698904	224.947	±	17.5453	1.92888	±	1.27542	7.67514	±	2.99709	311.109
	stage 2	152.952	±	90.5025	25.55	±	2.10279	177.321	±	60.9253	5.04425	±	4.88054	0	±	0	360.868
	stage 3	139.641	±	2.94579	14.5248	±	2.45106	106.717	±	15.6677	11.471	±	3.65802	34.6175	±	4.2981	306.972
	stage 4	99.8455	±	11.5039	378.361	±	76.041	175.354	±	33.6391	7.81244	±	1.625	522.722	±	68.3627	1184.09
	stage 5	13.9939	±	3.42008	116.062	±	23.7836	5.25888	±	0.405411	1.13968	±	0.424799	15.3349	±	2.19623	151.789
DZ-type CKs	Nicotiana alata	DZ7G			Ʃ DZ-types
	stage 1	11.9131	±	11.0558	11.9131	11.9131	11.9131
	stage 2	98.5647	±	24.9816	98.5647	98.5647	98.5647
	stage 3	105.937	±	58.2106	105.937	105.937	105.937
	stage 4	152.359	±	140.889	152.359	152.359	152.359
	stage 5	7.98396	±	9.37322	7.98396	7.98396	7.98396
CK methylthio-derivatives	Nicotiana alata	2MeSZR			Ʃ methylthiolated CKs
	stage 1	76.2183	±	30.9594	76.2183	76.2183	76.2183
	stage 2	69.3844	±	45.2293	69.3844	69.3844	69.3844
	stage 3	102.983	±	35.2618	102.983	102.983	102.983
	stage 4	31714.5	±	4414	31714.5	31714.5	31714.5
	stage 5	6365.88	±	1605.11	6365.88	6365.88	6365.88
ABA-types	Nicotiana alata	ABA			DPA			PA			ABA-GE			9OH-ABA			Ʃ ABA-types
	stage 1	3545.08	±	442.255	1113.69	±	78.9457	48.1463	±	1.26679	0	±	0	41.4508	±	13.5027	4748.37
	stage 2	26489.2	±	3926.4	3277.69	±	977.799	224.166	±	66.4393	28.8194	±	5.00204	147.453	±	62.0866	30167.3
	stage 3	11544.7	±	1888.8	1372.03	±	357.309	91.9434	±	10.2356	54.8993	±	13.0411	10.0497	±	1.29283	13073.6
	stage 4	6446.2	±	1305.79	1635.97	±	373.881	209.957	±	163.795	0	±	0	24.1023	±	0.167719	8316.22
	stage 5	2856.59	±	706.766	111.588	±	25.9529	20.3812	±	8.07856	0	±	0	0	±	0	2988.55
AUXINS	Nicotiana alata	IAA			IAA-Asp			OxIAA			Ʃ auxins
	stage 1	403.17	±	163.222	69.5154	±	29.8962	16.3797	±	3.67863	489.065
	stage 2	490.289	±	8.82913	51.1217	±	24.0262	90.9157	±	10.2873	632.326
	stage 3	1724.16	±	61.1466	67.9904	±	26.115	32.0492	±	40.8331	1824.2
	stage 4	20498	±	4963.85	3502.65	±	457.331	171.199	±	7.30141	24171.9
	stage 5	1814.32	±	504.837	189.77	±	20.8069	23.5536	±	5.33061	2027.64
JASMONATES	Nicotiana alata	JA			JA-Ileu			Ʃ jasmonates
	stage 1	441.838	±	115.171	177.939	±	69.4414	619.777
	stage 2	30212	±	6809.66	3325.08	±	713.445	33537.1
	stage 3	12620.4	±	920.178	2501.15	±	399.825	15121.5
	stage 4	54172.7	±	9973.9	161004	±	10488	215176
	stage 5	35242.9	±	7470.16	54323.6	±	5861.99	89566.6
PHENOLIC COMPOUNDS	Nicotiana alata	SA			BzA			PAA			Ʃ phenolic compounds
	stage 1	6176.78	±	4297.67	84058.8	±	1446.75	468.793	±	111.045	90704.4
	stage 2	11116.3	±	978.979	76253.4	±	22332.7	364.944	±	1.3005	87734.7
	stage 3	10536.3	±	825.049	49057.2	±	10654.5	2360.72	±	221.332	61954.2
	stage 4	76224.3	±	20388.8	1.8033e+06	±	297491	58027.3	±	13200.9	1.93755e+06
	stage 5	14809	±	4092.33	345810	±	44100.6	31650	±	6271.55	392269
